# Supplementary material
Source: publisher figshare collection journal article supplement (https://acs.figshare.com/ndownloader/files/4526842)
Supplement: Supplementary file 1 [file 4526842]

 
data_shelxl 
 
_audit_creation_method            SHELXL-97 
_chemical_name_systematic 
; 
 ? 
; 
_chemical_name_common             ? 
_chemical_melting_point           ? 
_chemical_formula_moiety          'C57 H45 N2 Rh Si2'  
_chemical_formula_sum 
 'C57 H45 N2 Rh Si2' 
_chemical_formula_weight          917.04 
 
loop_ 
 _atom_type_symbol 
 _atom_type_description 
 _atom_type_scat_dispersion_real 
 _atom_type_scat_dispersion_imag 
 _atom_type_scat_source 
 'C'  'C'   0.0033   0.0016 
 'International Tables Vol C Tables 4.2.6.8 and 6.1.1.4' 
 'H'  'H'   0.0000   0.0000 
 'International Tables Vol C Tables 4.2.6.8 and 6.1.1.4' 
 'N'  'N'   0.0061   0.0033 
 'International Tables Vol C Tables 4.2.6.8 and 6.1.1.4' 
 'Si'  'Si'   0.0817   0.0704 
 'International Tables Vol C Tables 4.2.6.8 and 6.1.1.4' 
 'Rh'  'Rh'  -1.1178   0.9187 
 'International Tables Vol C Tables 4.2.6.8 and 6.1.1.4' 
 
_symmetry_cell_setting            monoclinic 
_symmetry_space_group_name_H-M    'p 21/n' 
_symmetry_space_group_name_Hall   '-p 2yn'

loop_ 
 _symmetry_equiv_pos_as_xyz 
 'x, y, z' 
 '-x+1/2, y+1/2, -z+1/2' 
 '-x, -y, -z' 
 'x-1/2, -y-1/2, z-1/2' 
 
_cell_length_a                    11.8170(10) 
_cell_length_b                    15.419(2) 
_cell_length_c                    25.088(3) 
_cell_angle_alpha                 90.00 
_cell_angle_beta                  93.571(2) 
_cell_angle_gamma                 90.00 
_cell_volume                      4562.3(9) 
_cell_formula_units_Z             4 
_cell_measurement_temperature     173(2) 
_cell_measurement_reflns_used     1636 
_cell_measurement_theta_min       2.283 
_cell_measurement_theta_max       20.648 
 
_exptl_crystal_description        plate 
_exptl_crystal_colour             red 
_exptl_crystal_size_max           0.09 
_exptl_crystal_size_mid          0.055 
_exptl_crystal_size_min           0.045 
_exptl_crystal_density_meas       ? 
_exptl_crystal_density_diffrn     1.335 
_exptl_crystal_density_method     'not measured' 
_exptl_crystal_F_000              1896 
_exptl_absorpt_coefficient_mu     0.468 
_exptl_absorpt_correction_type    multi-scan 
_exptl_absorpt_correction_T_min   0.85 
_exptl_absorpt_correction_T_max   0.97
_exptl_absorpt_process_details    'sadabs, 2004' 
 
_exptl_special_details 
; 
 ? 
; 
 
_diffrn_ambient_temperature       173(2) 
_diffrn_radiation_wavelength      0.71070 
_diffrn_radiation_type            MoK\a 
_diffrn_radiation_source          'fine-focus sealed tube' 
_diffrn_radiation_monochromator   graphite 
_diffrn_measurement_device_type   'Bruker p4' 
_diffrn_measurement_method       'omega and phi scans' 
_diffrn_detector_area_resol_mean  ? 
_diffrn_reflns_number             19892 
_diffrn_reflns_av_R_equivalents   0.0871 
_diffrn_reflns_av_sigmaI/netI     0.1025 
_diffrn_reflns_limit_h_min        -13 
_diffrn_reflns_limit_h_max        11 
_diffrn_reflns_limit_k_min        -13 
_diffrn_reflns_limit_k_max        17 
_diffrn_reflns_limit_l_min        -27 
_diffrn_reflns_limit_l_max        24 
_diffrn_reflns_theta_min          2.10 
_diffrn_reflns_theta_max          23.26 
_reflns_number_total              6538 
_reflns_number_gt                 4183 
_reflns_threshold_expression      >2sigma(I) 
 
_computing_data_collection        ? 
_computing_cell_refinement        ? 
_computing_data_reduction         ? 
_computing_structure_solution     'SHELXS-97 (Sheldrick, 2008)' 
_computing_structure_refinement   'SHELXL-97 (Sheldrick, 2008)' 
_computing_molecular_graphics     ? 
_computing_publication_material   ? 
 
_refine_special_details 
; 
 Refinement of F^2^ against ALL reflections.  The weighted R-factor wR and 
 goodness of fit S are based on F^2^, conventional R-factors R are based 
 on F, with F set to zero for negative F^2^. The threshold expression of 
 F^2^ > 2sigma(F^2^) is used only for calculating R-factors(gt) etc. and is 
 not relevant to the choice of reflections for refinement.  R-factors based 
 on F^2^ are statistically about twice as large as those based on F, and R- 
 factors based on ALL data will be even larger. 
; 
 
_refine_ls_structure_factor_coef  Fsqd  
_refine_ls_matrix_type            full 
_refine_ls_weighting_scheme       calc  
_refine_ls_weighting_details 
 'calc w=1/[\s^2^(Fo^2^)+(0.0530P)^2^+0.0000P] where P=(Fo^2^+2Fc^2^)/3' 
_atom_sites_solution_primary      direct 
_atom_sites_solution_secondary    difmap 
_atom_sites_solution_hydrogens    geom 
_refine_ls_hydrogen_treatment     constr 
_refine_ls_extinction_method      none 
_refine_ls_extinction_coef        ? 
_refine_ls_number_reflns          6538 
_refine_ls_number_parameters      559 
_refine_ls_number_restraints      0 
_refine_ls_R_factor_all           0.1003 
_refine_ls_R_factor_gt            0.0497 
_refine_ls_wR_factor_ref          0.1127 
_refine_ls_wR_factor_gt           0.0966 
_refine_ls_goodness_of_fit_ref    0.958 
_refine_ls_restrained_S_all       0.958 
_refine_ls_shift/su_max           0.001 
_refine_ls_shift/su_mean          0.000 
 
loop_ 
 _atom_site_label 
 _atom_site_type_symbol 
 _atom_site_fract_x 
 _atom_site_fract_y 
 _atom_site_fract_z 
 _atom_site_U_iso_or_equiv 
 _atom_site_adp_type 
 _atom_site_occupancy 
 _atom_site_symmetry_multiplicity 
 _atom_site_calc_flag 
 _atom_site_refinement_flags 
 _atom_site_disorder_assembly 
 _atom_site_disorder_group 
Rh1 Rh 0.47851(3) 0.23062(3) 0.348061(17) 0.02286(14) Uani 1 1 d . . . 
Si1 Si 0.38093(13) 0.36107(10) 0.34704(6) 0.0255(4) Uani 1 1 d . . . 
Si2 Si 0.46497(12) 0.14793(10) 0.42554(6) 0.0252(4) Uani 1 1 d . . . 
N1 N 0.5867(3) 0.2369(3) 0.28795(17) 0.0227(10) Uani 1 1 d . . . 
N2 N 0.3848(3) 0.1632(3) 0.28437(17) 0.0239(11) Uani 1 1 d . . . 
C1 C 0.2828(5) 0.1256(3) 0.2866(2) 0.0280(14) Uani 1 1 d . . . 
H1 H 0.2516 0.1217 0.3196 0.034 Uiso 1 1 calc R . . 
C2 C 0.2223(5) 0.0927(3) 0.2431(2) 0.0271(14) Uani 1 1 d . . . 
H2 H 0.1509 0.0684 0.2460 0.033 Uiso 1 1 calc R . . 
C3 C 0.2715(5) 0.0971(4) 0.1947(2) 0.0353(15) Uani 1 1 d . . . 
H3 H 0.2329 0.0751 0.1643 0.042 Uiso 1 1 calc R . . 
C4 C 0.3761(5) 0.1334(3) 0.1910(2) 0.0318(14) Uani 1 1 d . . . 
H4 H 0.4097 0.1342 0.1585 0.038 Uiso 1 1 calc R . . 
C5 C 0.4323(4) 0.1693(3) 0.2365(2) 0.0222(13) Uani 1 1 d . . . 
C6 C 0.5398(4) 0.2146(3) 0.2380(2) 0.0203(12) Uani 1 1 d . . . 
C7 C 0.6107(4) 0.2425(3) 0.1984(2) 0.0235(13) Uani 1 1 d . . . 
C8 C 0.7041(4) 0.2810(3) 0.2261(2) 0.0232(13) Uani 1 1 d . . . 
H8 H 0.7667 0.3047 0.2107 0.028 Uiso 1 1 calc R . . 
C9 C 0.6880(4) 0.2780(3) 0.2803(2) 0.0224(12) Uani 1 1 d . . . 
C10 C 0.5922(4) 0.2389(3) 0.1393(2) 0.0247(13) Uani 1 1 d . . . 
C11 C 0.6748(5) 0.2089(4) 0.1080(2) 0.0376(16) Uani 1 1 d . . . 
H11 H 0.7413 0.1865 0.1243 0.045 Uiso 1 1 calc R . . 
C12 C 0.6619(5) 0.2109(4) 0.0535(2) 0.0476(18) Uani 1 1 d . . . 
H12 H 0.7203 0.1912 0.0334 0.057 Uiso 1 1 calc R . . 
C13 C 0.5655(5) 0.2410(4) 0.0284(2) 0.0398(16) Uani 1 1 d . . . 
H13 H 0.5562 0.2404 -0.0087 0.048 Uiso 1 1 calc R . . 
C14 C 0.4805(5) 0.2729(4) 0.0586(2) 0.0417(16) Uani 1 1 d . . . 
H14 H 0.4143 0.2949 0.0418 0.050 Uiso 1 1 calc R . . 
C15 C 0.4939(5) 0.2721(4) 0.1133(2) 0.0342(14) Uani 1 1 d . . . 
H15 H 0.4367 0.2940 0.1333 0.041 Uiso 1 1 calc R . . 
C16 C 0.7624(4) 0.3106(4) 0.3250(2) 0.0262(13) Uani 1 1 d . . . 
C17 C 0.7875(4) 0.2598(4) 0.3702(2) 0.0372(15) Uani 1 1 d . . . 
H17 H 0.7551 0.2050 0.3724 0.045 Uiso 1 1 calc R . . 
C18 C 0.8589(5) 0.2889(4) 0.4117(2) 0.0421(17) Uani 1 1 d . . . 
H18 H 0.8755 0.2539 0.4413 0.050 Uiso 1 1 calc R . . 
C19 C 0.9056(5) 0.3704(5) 0.4089(3) 0.0480(18) Uani 1 1 d . . . 
H19 H 0.9532 0.3907 0.4372 0.058 Uiso 1 1 calc R . . 
C20 C 0.8831(5) 0.4216(4) 0.3657(3) 0.0430(17) Uani 1 1 d . . . 
H20 H 0.9162 0.4761 0.3641 0.052 Uiso 1 1 calc R . . 
C21 C 0.8104(4) 0.3923(4) 0.3238(2) 0.0317(14) Uani 1 1 d . . . 
H21 H 0.7938 0.4282 0.2946 0.038 Uiso 1 1 calc R . . 
C22 C 0.4732(4) 0.4448(3) 0.3161(2) 0.0242(13) Uani 1 1 d . . . 
C23 C 0.5039(4) 0.5207(3) 0.3437(2) 0.0327(15) Uani 1 1 d . . . 
H23 H 0.4807 0.5287 0.3782 0.039 Uiso 1 1 calc R . . 
C24 C 0.5684(5) 0.5846(4) 0.3209(3) 0.0406(16) Uani 1 1 d . . . 
H24 H 0.5877 0.6347 0.3401 0.049 Uiso 1 1 calc R . . 
C25 C 0.6032(5) 0.5740(4) 0.2706(3) 0.0378(16) Uani 1 1 d . . . 
H25 H 0.6464 0.6169 0.2554 0.045 Uiso 1 1 calc R . . 
C26 C 0.5746(4) 0.4997(4) 0.2419(2) 0.0343(15) Uani 1 1 d . . . 
H26 H 0.5979 0.4926 0.2074 0.041 Uiso 1 1 calc R . . 
C27 C 0.5107(4) 0.4358(3) 0.2650(2) 0.0268(14) Uani 1 1 d . . . 
H27 H 0.4926 0.3857 0.2457 0.032 Uiso 1 1 calc R . . 
C28 C 0.2483(4) 0.3424(3) 0.3027(2) 0.0259(13) Uani 1 1 d . . . 
C29 C 0.2326(5) 0.3686(4) 0.2497(2) 0.0343(15) Uani 1 1 d . . . 
H29 H 0.2900 0.3992 0.2343 0.041 Uiso 1 1 calc R . . 
C30 C 0.1346(5) 0.3504(4) 0.2195(2) 0.0390(16) Uani 1 1 d . . . 
H30 H 0.1273 0.3677 0.1839 0.047 Uiso 1 1 calc R . . 
C31 C 0.0478(5) 0.3073(4) 0.2411(3) 0.0408(16) Uani 1 1 d . . . 
H31 H -0.0190 0.2969 0.2205 0.049 Uiso 1 1 calc R . . 
C32 C 0.0585(5) 0.2792(4) 0.2931(3) 0.0374(15) Uani 1 1 d . . . 
H32 H 0.0005 0.2479 0.3075 0.045 Uiso 1 1 calc R . . 
C33 C 0.1573(5) 0.2983(3) 0.3240(2) 0.0335(15) Uani 1 1 d . . . 
H33 H 0.1633 0.2814 0.3597 0.040 Uiso 1 1 calc R . . 
C34 C 0.3349(5) 0.4064(3) 0.4120(2) 0.0266(14) Uani 1 1 d . . . 
C35 C 0.4068(5) 0.4066(4) 0.4576(2) 0.0361(15) Uani 1 1 d . . . 
H35 H 0.4772 0.3798 0.4568 0.043 Uiso 1 1 calc R . . 
C36 C 0.3773(6) 0.4453(4) 0.5047(2) 0.0449(17) Uani 1 1 d . . . 
H36 H 0.4266 0.4426 0.5351 0.054 Uiso 1 1 calc R . . 
C37 C 0.2747(6) 0.4877(4) 0.5064(3) 0.0516(19) Uani 1 1 d . . . 
H37 H 0.2553 0.5152 0.5376 0.062 Uiso 1 1 calc R . . 
C38 C 0.2018(6) 0.4888(4) 0.4620(3) 0.0473(18) Uani 1 1 d . . . 
H38 H 0.1323 0.5169 0.4630 0.057 Uiso 1 1 calc R . . 
C39 C 0.2306(5) 0.4486(4) 0.4157(3) 0.0386(16) Uani 1 1 d . . . 
H39 H 0.1793 0.4495 0.3860 0.046 Uiso 1 1 calc R . . 
C40 C 0.3290(4) 0.0839(4) 0.4275(2) 0.0258(14) Uani 1 1 d . . . 
C41 C 0.3255(5) -0.0042(4) 0.4167(2) 0.0311(14) Uani 1 1 d . . . 
H41 H 0.3926 -0.0342 0.4124 0.037 Uiso 1 1 calc R . . 
C42 C 0.2232(5) -0.0481(4) 0.4121(2) 0.0420(16) Uani 1 1 d . . . 
H42 H 0.2222 -0.1072 0.4046 0.050 Uiso 1 1 calc R . . 
C43 C 0.1226(5) -0.0050(4) 0.4187(2) 0.0403(16) Uani 1 1 d . . . 
H43 H 0.0543 -0.0350 0.4158 0.048 Uiso 1 1 calc R . . 
C44 C 0.1238(5) 0.0825(4) 0.4295(2) 0.0411(16) Uani 1 1 d . . . 
H44 H 0.0563 0.1122 0.4337 0.049 Uiso 1 1 calc R . . 
C45 C 0.2263(5) 0.1260(4) 0.4342(2) 0.0325(15) Uani 1 1 d . . . 
H45 H 0.2268 0.1850 0.4421 0.039 Uiso 1 1 calc R . . 
C46 C 0.5053(4) 0.1968(3) 0.4929(2) 0.0232(13) Uani 1 1 d . . . 
C47 C 0.6020(5) 0.2481(3) 0.5006(2) 0.0332(15) Uani 1 1 d . . . 
H47 H 0.6441 0.2609 0.4715 0.040 Uiso 1 1 calc R . . 
C48 C 0.6371(5) 0.2806(4) 0.5503(2) 0.0365(15) Uani 1 1 d . . . 
H48 H 0.7019 0.3148 0.5545 0.044 Uiso 1 1 calc R . . 
C49 C 0.5748(5) 0.2614(4) 0.5934(2) 0.0344(14) Uani 1 1 d . . . 
H49 H 0.5979 0.2824 0.6271 0.041 Uiso 1 1 calc R . . 
C50 C 0.4779(5) 0.2111(4) 0.5868(2) 0.0344(15) Uani 1 1 d . . . 
H50 H 0.4352 0.1993 0.6158 0.041 Uiso 1 1 calc R . . 
C51 C 0.4449(5) 0.1785(3) 0.5372(2) 0.0293(14) Uani 1 1 d . . . 
H51 H 0.3809 0.1435 0.5333 0.035 Uiso 1 1 calc R . . 
C52 C 0.5816(5) 0.0735(3) 0.4063(2) 0.0256(13) Uani 1 1 d . . . 
C53 C 0.5773(5) 0.0301(3) 0.3570(2) 0.0339(15) Uani 1 1 d . . . 
H53 H 0.5153 0.0386 0.3330 0.041 Uiso 1 1 calc R . . 
C54 C 0.6635(5) -0.0253(4) 0.3434(2) 0.0371(16) Uani 1 1 d . . . 
H54 H 0.6594 -0.0527 0.3103 0.045 Uiso 1 1 calc R . . 
C55 C 0.7554(5) -0.0394(4) 0.3791(3) 0.0398(16) Uani 1 1 d . . . 
H55 H 0.8124 -0.0776 0.3705 0.048 Uiso 1 1 calc R . . 
C56 C 0.7622(5) 0.0026(4) 0.4266(3) 0.0361(15) Uani 1 1 d . . . 
H56 H 0.8248 -0.0066 0.4503 0.043 Uiso 1 1 calc R . . 
C57 C 0.6772(5) 0.0591(3) 0.4407(2) 0.0309(14) Uani 1 1 d . . . 
H57 H 0.6842 0.0877 0.4734 0.037 Uiso 1 1 calc R . . 
 
loop_ 
 _atom_site_aniso_label 
 _atom_site_aniso_U_11 
 _atom_site_aniso_U_22 
 _atom_site_aniso_U_33 
 _atom_site_aniso_U_23 
 _atom_site_aniso_U_13 
 _atom_site_aniso_U_12 
Rh1 0.0215(2) 0.0248(2) 0.0224(3) -0.0008(2) 0.00245(17) -0.0025(2) 
Si1 0.0274(9) 0.0242(9) 0.0246(10) -0.0017(7) -0.0010(7) -0.0028(7) 
Si2 0.0253(9) 0.0255(9) 0.0249(10) -0.0017(7) 0.0021(7) -0.0018(7) 
N1 0.021(2) 0.022(2) 0.025(3) -0.001(2) 0.001(2) -0.001(2) 
N2 0.025(3) 0.019(3) 0.027(3) 0.002(2) 0.002(2) -0.001(2) 
C1 0.032(4) 0.028(3) 0.026(4) 0.001(3) 0.010(3) -0.005(3) 
C2 0.024(3) 0.028(3) 0.029(4) -0.006(3) 0.002(3) -0.005(3) 
C3 0.032(4) 0.039(4) 0.034(4) -0.008(3) -0.009(3) -0.002(3) 
C4 0.033(4) 0.038(4) 0.025(4) -0.007(3) 0.005(3) -0.003(3) 
C5 0.024(3) 0.023(3) 0.019(3) 0.003(2) 0.002(3) 0.009(3) 
C6 0.021(3) 0.018(3) 0.022(3) 0.004(2) 0.002(2) -0.001(2) 
C7 0.026(3) 0.024(3) 0.021(3) 0.000(2) 0.003(2) 0.005(2) 
C8 0.020(3) 0.026(3) 0.023(3) 0.003(3) 0.005(2) -0.002(3) 
C9 0.019(3) 0.022(3) 0.027(3) 0.002(3) 0.000(2) 0.002(3) 
C10 0.026(3) 0.023(3) 0.025(3) 0.002(2) 0.006(3) -0.003(3) 
C11 0.022(3) 0.059(5) 0.031(4) -0.002(3) 0.001(3) 0.016(3) 
C12 0.037(4) 0.075(5) 0.032(4) -0.009(3) 0.011(3) 0.019(4) 
C13 0.036(4) 0.058(4) 0.026(4) -0.002(3) 0.002(3) 0.001(3) 
C14 0.034(4) 0.052(4) 0.038(4) 0.006(3) -0.008(3) 0.010(3) 
C15 0.037(4) 0.039(3) 0.027(4) 0.001(3) 0.006(3) 0.010(3) 
C16 0.020(3) 0.038(3) 0.021(3) -0.001(3) 0.004(3) -0.002(3) 
C17 0.020(3) 0.056(4) 0.036(4) 0.008(3) 0.002(3) -0.006(3) 
C18 0.028(4) 0.078(5) 0.020(4) 0.007(3) -0.003(3) 0.000(4) 
C19 0.037(4) 0.076(5) 0.031(4) -0.020(4) 0.003(3) -0.012(4) 
C20 0.034(4) 0.042(4) 0.053(5) -0.013(3) 0.000(3) -0.010(3) 
C21 0.029(3) 0.035(4) 0.031(4) 0.001(3) 0.001(3) -0.007(3) 
C22 0.019(3) 0.022(3) 0.032(4) 0.001(3) -0.003(3) 0.002(2) 
C23 0.036(4) 0.031(4) 0.030(4) 0.001(3) -0.002(3) 0.000(3) 
C24 0.041(4) 0.028(4) 0.053(5) -0.002(3) -0.002(3) -0.007(3) 
C25 0.028(4) 0.027(4) 0.059(5) 0.009(3) 0.007(3) -0.006(3) 
C26 0.030(4) 0.040(4) 0.035(4) 0.002(3) 0.011(3) 0.010(3) 
C27 0.027(3) 0.024(3) 0.029(4) -0.001(3) 0.000(3) 0.005(3) 
C28 0.027(3) 0.016(3) 0.034(4) -0.007(3) 0.003(3) 0.001(3) 
C29 0.035(4) 0.033(4) 0.035(4) 0.000(3) 0.004(3) 0.000(3) 
C30 0.038(4) 0.052(4) 0.025(4) 0.002(3) -0.010(3) -0.004(3) 
C31 0.028(4) 0.047(4) 0.045(5) -0.010(3) -0.015(3) 0.003(3) 
C32 0.021(3) 0.034(4) 0.057(5) -0.001(3) 0.002(3) -0.005(3) 
C33 0.030(4) 0.036(4) 0.035(4) 0.000(3) 0.005(3) 0.000(3) 
C34 0.036(4) 0.023(3) 0.021(3) 0.000(2) -0.001(3) -0.006(3) 
C35 0.041(4) 0.036(4) 0.031(4) -0.006(3) 0.006(3) -0.003(3) 
C36 0.063(5) 0.049(4) 0.024(4) -0.003(3) 0.006(3) -0.014(4) 
C37 0.066(5) 0.051(5) 0.039(5) -0.022(3) 0.019(4) -0.016(4) 
C38 0.051(4) 0.040(4) 0.054(5) -0.012(3) 0.024(4) 0.000(3) 
C39 0.036(4) 0.038(4) 0.042(4) 0.000(3) 0.007(3) -0.001(3) 
C40 0.032(4) 0.030(4) 0.015(3) 0.001(2) 0.001(3) 0.001(3) 
C41 0.026(3) 0.034(4) 0.033(4) 0.003(3) -0.001(3) 0.000(3) 
C42 0.044(4) 0.035(4) 0.048(4) -0.004(3) 0.005(3) -0.010(3) 
C43 0.028(4) 0.043(4) 0.050(5) -0.008(3) 0.003(3) -0.018(3) 
C44 0.029(4) 0.048(4) 0.047(4) -0.003(3) 0.006(3) 0.002(3) 
C45 0.041(4) 0.023(3) 0.034(4) -0.001(3) 0.007(3) 0.001(3) 
C46 0.027(3) 0.024(3) 0.018(3) 0.000(2) 0.000(3) 0.001(3) 
C47 0.035(4) 0.042(4) 0.023(3) -0.003(3) 0.006(3) -0.003(3) 
C48 0.033(3) 0.041(4) 0.034(4) 0.001(3) -0.005(3) -0.007(3) 
C49 0.042(4) 0.035(4) 0.025(3) -0.005(3) -0.006(3) 0.003(3) 
C50 0.039(4) 0.039(4) 0.025(4) 0.000(3) 0.004(3) 0.003(3) 
C51 0.028(3) 0.025(3) 0.035(4) -0.003(3) 0.000(3) -0.002(3) 
C52 0.033(3) 0.022(3) 0.023(3) 0.004(2) 0.005(3) -0.001(3) 
C53 0.038(4) 0.032(4) 0.031(4) 0.005(3) -0.001(3) 0.004(3) 
C54 0.049(4) 0.033(4) 0.030(4) 0.003(3) 0.012(3) 0.006(3) 
C55 0.042(4) 0.034(4) 0.045(5) 0.005(3) 0.022(4) 0.011(3) 
C56 0.022(3) 0.039(4) 0.046(4) 0.010(3) -0.003(3) 0.005(3) 
C57 0.033(4) 0.028(3) 0.032(4) 0.005(3) 0.004(3) 0.003(3) 
 
_geom_special_details 
; 
 All esds (except the esd in the dihedral angle between two l.s. planes) 
 are estimated using the full covariance matrix.  The cell esds are taken 
 into account individually in the estimation of esds in distances, angles 
 and torsion angles; correlations between esds in cell parameters are only 
 used when they are defined by crystal symmetry.  An approximate (isotropic) 
 treatment of cell esds is used for estimating esds involving l.s. planes. 
; 
 
loop_ 
 _geom_bond_atom_site_label_1 
 _geom_bond_atom_site_label_2 
 _geom_bond_distance 
 _geom_bond_site_symmetry_2 
 _geom_bond_publ_flag 
Rh1 N1 2.039(4) . ? 
Rh1 N2 2.154(4) . ? 
Rh1 Si1 2.3179(16) . ? 
Rh1 Si2 2.3385(16) . ? 
Si1 C34 1.883(6) . ? 
Si1 C22 1.887(5) . ? 
Si1 C28 1.887(6) . ? 
Si2 C52 1.880(5) . ? 
Si2 C46 1.885(5) . ? 
Si2 C40 1.889(5) . ? 
N1 C9 1.378(6) . ? 
N1 C6 1.382(6) . ? 
N2 C1 1.342(6) . ? 
N2 C5 1.359(6) . ? 
C1 C2 1.364(7) . ? 
C1 H1 0.9300 . ? 
C2 C3 1.379(7) . ? 
C2 H2 0.9300 . ? 
C3 C4 1.365(7) . ? 
C3 H3 0.9300 . ? 
C4 C5 1.399(7) . ? 
C4 H4 0.9300 . ? 
C5 C6 1.448(7) . ? 
C6 C7 1.406(7) . ? 
C7 C8 1.399(7) . ? 
C7 C10 1.487(7) . ? 
C8 C9 1.385(7) . ? 
C8 H8 0.9300 . ? 
C9 C16 1.470(7) . ? 
C10 C11 1.370(7) . ? 
C10 C15 1.394(7) . ? 
C11 C12 1.368(8) . ? 
C11 H11 0.9300 . ? 
C12 C13 1.349(8) . ? 
C12 H12 0.9300 . ? 
C13 C14 1.385(8) . ? 
C13 H13 0.9300 . ? 
C14 C15 1.371(8) . ? 
C14 H14 0.9300 . ? 
C15 H15 0.9300 . ? 
C16 C21 1.383(7) . ? 
C16 C17 1.395(7) . ? 
C17 C18 1.373(8) . ? 
C17 H17 0.9300 . ? 
C18 C19 1.376(8) . ? 
C18 H18 0.9300 . ? 
C19 C20 1.353(9) . ? 
C19 H19 0.9300 . ? 
C20 C21 1.391(8) . ? 
C20 H20 0.9300 . ? 
C21 H21 0.9300 . ? 
C22 C27 1.389(7) . ? 
C22 C23 1.398(7) . ? 
C23 C24 1.390(7) . ? 
C23 H23 0.9300 . ? 
C24 C25 1.364(8) . ? 
C24 H24 0.9300 . ? 
C25 C26 1.384(8) . ? 
C25 H25 0.9300 . ? 
C26 C27 1.390(7) . ? 
C26 H26 0.9300 . ? 
C27 H27 0.9300 . ? 
C28 C29 1.390(8) . ? 
C28 C33 1.406(7) . ? 
C29 C30 1.374(8) . ? 
C29 H29 0.9300 . ? 
C30 C31 1.362(8) . ? 
C30 H30 0.9300 . ? 
C31 C32 1.374(8) . ? 
C31 H31 0.9300 . ? 
C32 C33 1.391(8) . ? 
C32 H32 0.9300 . ? 
C33 H33 0.9300 . ? 
C34 C35 1.383(8) . ? 
C34 C39 1.403(7) . ? 
C35 C36 1.387(8) . ? 
C35 H35 0.9300 . ? 
C36 C37 1.381(8) . ? 
C36 H36 0.9300 . ? 
C37 C38 1.366(9) . ? 
C37 H37 0.9300 . ? 
C38 C39 1.377(8) . ? 
C38 H38 0.9300 . ? 
C39 H39 0.9300 . ? 
C40 C41 1.386(7) . ? 
C40 C45 1.396(7) . ? 
C41 C42 1.384(7) . ? 
C41 H41 0.9300 . ? 
C42 C43 1.380(8) . ? 
C42 H42 0.9300 . ? 
C43 C44 1.377(8) . ? 
C43 H43 0.9300 . ? 
C44 C45 1.383(7) . ? 
C44 H44 0.9300 . ? 
C45 H45 0.9300 . ? 
C46 C51 1.387(7) . ? 
C46 C47 1.393(7) . ? 
C47 C48 1.383(8) . ? 
C47 H47 0.9300 . ? 
C48 C49 1.378(7) . ? 
C48 H48 0.9300 . ? 
C49 C50 1.385(7) . ? 
C49 H49 0.9300 . ? 
C50 C51 1.374(7) . ? 
C50 H50 0.9300 . ? 
C51 H51 0.9300 . ? 
C52 C57 1.396(7) . ? 
C52 C53 1.404(7) . ? 
C53 C54 1.387(7) . ? 
C53 H53 0.9300 . ? 
C54 C55 1.381(8) . ? 
C54 H54 0.9300 . ? 
C55 C56 1.355(8) . ? 
C55 H55 0.9300 . ? 
C56 C57 1.391(7) . ? 
C56 H56 0.9300 . ? 
C57 H57 0.9300 . ? 
 
loop_ 
 _geom_angle_atom_site_label_1 
 _geom_angle_atom_site_label_2 
 _geom_angle_atom_site_label_3 
 _geom_angle 
 _geom_angle_site_symmetry_1 
 _geom_angle_site_symmetry_3 
 _geom_angle_publ_flag 
N1 Rh1 N2 77.96(16) . . ? 
N1 Rh1 Si1 106.55(12) . . ? 
N2 Rh1 Si1 100.26(11) . . ? 
N1 Rh1 Si2 135.99(12) . . ? 
N2 Rh1 Si2 107.16(12) . . ? 
Si1 Rh1 Si2 115.00(6) . . ? 
C34 Si1 C22 107.9(2) . . ? 
C34 Si1 C28 107.0(2) . . ? 
C22 Si1 C28 110.0(2) . . ? 
C34 Si1 Rh1 118.85(18) . . ? 
C22 Si1 Rh1 107.35(16) . . ? 
C28 Si1 Rh1 105.59(16) . . ? 
C52 Si2 C46 109.0(2) . . ? 
C52 Si2 C40 109.0(2) . . ? 
C46 Si2 C40 110.7(2) . . ? 
C52 Si2 Rh1 91.73(17) . . ? 
C46 Si2 Rh1 120.05(17) . . ? 
C40 Si2 Rh1 114.15(17) . . ? 
C9 N1 C6 107.0(4) . . ? 
C9 N1 Rh1 135.6(3) . . ? 
C6 N1 Rh1 115.1(3) . . ? 
C1 N2 C5 119.2(5) . . ? 
C1 N2 Rh1 126.8(3) . . ? 
C5 N2 Rh1 113.6(3) . . ? 
N2 C1 C2 123.7(5) . . ? 
N2 C1 H1 118.1 . . ? 
C2 C1 H1 118.1 . . ? 
C1 C2 C3 117.2(5) . . ? 
C1 C2 H2 121.4 . . ? 
C3 C2 H2 121.4 . . ? 
C4 C3 C2 120.9(5) . . ? 
C4 C3 H3 119.6 . . ? 
C2 C3 H3 119.6 . . ? 
C3 C4 C5 119.5(5) . . ? 
C3 C4 H4 120.2 . . ? 
C5 C4 H4 120.2 . . ? 
N2 C5 C4 119.5(5) . . ? 
N2 C5 C6 114.9(5) . . ? 
C4 C5 C6 125.7(5) . . ? 
N1 C6 C7 109.9(4) . . ? 
N1 C6 C5 116.4(4) . . ? 
C7 C6 C5 133.7(5) . . ? 
C8 C7 C6 105.4(5) . . ? 
C8 C7 C10 125.0(5) . . ? 
C6 C7 C10 129.5(5) . . ? 
C9 C8 C7 108.7(4) . . ? 
C9 C8 H8 125.6 . . ? 
C7 C8 H8 125.6 . . ? 
N1 C9 C8 109.0(4) . . ? 
N1 C9 C16 122.3(4) . . ? 
C8 C9 C16 128.7(5) . . ? 
C11 C10 C15 117.3(5) . . ? 
C11 C10 C7 121.2(5) . . ? 
C15 C10 C7 121.3(5) . . ? 
C12 C11 C10 121.8(5) . . ? 
C12 C11 H11 119.1 . . ? 
C10 C11 H11 119.1 . . ? 
C13 C12 C11 120.8(5) . . ? 
C13 C12 H12 119.6 . . ? 
C11 C12 H12 119.6 . . ? 
C12 C13 C14 119.1(6) . . ? 
C12 C13 H13 120.4 . . ? 
C14 C13 H13 120.4 . . ? 
C15 C14 C13 120.1(6) . . ? 
C15 C14 H14 119.9 . . ? 
C13 C14 H14 119.9 . . ? 
C14 C15 C10 120.8(5) . . ? 
C14 C15 H15 119.6 . . ? 
C10 C15 H15 119.6 . . ? 
C21 C16 C17 117.6(5) . . ? 
C21 C16 C9 121.4(5) . . ? 
C17 C16 C9 121.0(5) . . ? 
C18 C17 C16 121.4(6) . . ? 
C18 C17 H17 119.3 . . ? 
C16 C17 H17 119.3 . . ? 
C19 C18 C17 119.4(6) . . ? 
C19 C18 H18 120.3 . . ? 
C17 C18 H18 120.3 . . ? 
C20 C19 C18 120.8(6) . . ? 
C20 C19 H19 119.6 . . ? 
C18 C19 H19 119.6 . . ? 
C19 C20 C21 119.9(6) . . ? 
C19 C20 H20 120.1 . . ? 
C21 C20 H20 120.1 . . ? 
C16 C21 C20 120.9(6) . . ? 
C16 C21 H21 119.6 . . ? 
C20 C21 H21 119.6 . . ? 
C27 C22 C23 116.9(5) . . ? 
C27 C22 Si1 122.5(4) . . ? 
C23 C22 Si1 120.5(4) . . ? 
C24 C23 C22 121.5(6) . . ? 
C24 C23 H23 119.3 . . ? 
C22 C23 H23 119.3 . . ? 
C25 C24 C23 120.1(6) . . ? 
C25 C24 H24 120.0 . . ? 
C23 C24 H24 120.0 . . ? 
C24 C25 C26 120.2(5) . . ? 
C24 C25 H25 119.9 . . ? 
C26 C25 H25 119.9 . . ? 
C25 C26 C27 119.4(6) . . ? 
C25 C26 H26 120.3 . . ? 
C27 C26 H26 120.3 . . ? 
C22 C27 C26 121.9(5) . . ? 
C22 C27 H27 119.1 . . ? 
C26 C27 H27 119.1 . . ? 
C29 C28 C33 116.4(5) . . ? 
C29 C28 Si1 125.1(4) . . ? 
C33 C28 Si1 118.4(4) . . ? 
C30 C29 C28 121.7(5) . . ? 
C30 C29 H29 119.1 . . ? 
C28 C29 H29 119.1 . . ? 
C31 C30 C29 120.7(6) . . ? 
C31 C30 H30 119.7 . . ? 
C29 C30 H30 119.7 . . ? 
C30 C31 C32 120.3(6) . . ? 
C30 C31 H31 119.8 . . ? 
C32 C31 H31 119.8 . . ? 
C31 C32 C33 119.1(6) . . ? 
C31 C32 H32 120.4 . . ? 
C33 C32 H32 120.4 . . ? 
C32 C33 C28 121.7(6) . . ? 
C32 C33 H33 119.2 . . ? 
C28 C33 H33 119.2 . . ? 
C35 C34 C39 116.2(5) . . ? 
C35 C34 Si1 121.5(4) . . ? 
C39 C34 Si1 122.1(4) . . ? 
C34 C35 C36 122.2(6) . . ? 
C34 C35 H35 118.9 . . ? 
C36 C35 H35 118.9 . . ? 
C37 C36 C35 119.8(6) . . ? 
C37 C36 H36 120.1 . . ? 
C35 C36 H36 120.1 . . ? 
C38 C37 C36 119.4(6) . . ? 
C38 C37 H37 120.3 . . ? 
C36 C37 H37 120.3 . . ? 
C37 C38 C39 120.4(6) . . ? 
C37 C38 H38 119.8 . . ? 
C39 C38 H38 119.8 . . ? 
C38 C39 C34 121.9(6) . . ? 
C38 C39 H39 119.0 . . ? 
C34 C39 H39 119.0 . . ? 
C41 C40 C45 117.7(5) . . ? 
C41 C40 Si2 121.5(4) . . ? 
C45 C40 Si2 120.5(4) . . ? 
C40 C41 C42 120.7(5) . . ? 
C40 C41 H41 119.6 . . ? 
C42 C41 H41 119.6 . . ? 
C43 C42 C41 120.6(6) . . ? 
C43 C42 H42 119.7 . . ? 
C41 C42 H42 119.7 . . ? 
C44 C43 C42 119.8(5) . . ? 
C44 C43 H43 120.1 . . ? 
C42 C43 H43 120.1 . . ? 
C43 C44 C45 119.3(5) . . ? 
C43 C44 H44 120.3 . . ? 
C45 C44 H44 120.3 . . ? 
C44 C45 C40 121.9(5) . . ? 
C44 C45 H45 119.1 . . ? 
C40 C45 H45 119.1 . . ? 
C51 C46 C47 117.6(5) . . ? 
C51 C46 Si2 121.5(4) . . ? 
C47 C46 Si2 120.7(4) . . ? 
C48 C47 C46 121.8(5) . . ? 
C48 C47 H47 119.1 . . ? 
C46 C47 H47 119.1 . . ? 
C49 C48 C47 119.0(5) . . ? 
C49 C48 H48 120.5 . . ? 
C47 C48 H48 120.5 . . ? 
C48 C49 C50 120.3(5) . . ? 
C48 C49 H49 119.8 . . ? 
C50 C49 H49 119.8 . . ? 
C51 C50 C49 119.9(5) . . ? 
C51 C50 H50 120.0 . . ? 
C49 C50 H50 120.0 . . ? 
C50 C51 C46 121.3(5) . . ? 
C50 C51 H51 119.4 . . ? 
C46 C51 H51 119.4 . . ? 
C57 C52 C53 116.8(5) . . ? 
C57 C52 Si2 121.1(4) . . ? 
C53 C52 Si2 122.1(4) . . ? 
C54 C53 C52 121.6(6) . . ? 
C54 C53 H53 119.2 . . ? 
C52 C53 H53 119.2 . . ? 
C55 C54 C53 119.8(6) . . ? 
C55 C54 H54 120.1 . . ? 
C53 C54 H54 120.1 . . ? 
C56 C55 C54 119.8(6) . . ? 
C56 C55 H55 120.1 . . ? 
C54 C55 H55 120.1 . . ? 
C55 C56 C57 121.2(6) . . ? 
C55 C56 H56 119.4 . . ? 
C57 C56 H56 119.4 . . ? 
C56 C57 C52 120.8(6) . . ? 
C56 C57 H57 119.6 . . ? 
C52 C57 H57 119.6 . . ? 
 
_diffrn_measured_fraction_theta_max    0.997 
_diffrn_reflns_theta_full              23.26 
_diffrn_measured_fraction_theta_full   0.997 
_refine_diff_density_max    0.753 
_refine_diff_density_min   -0.361 
_refine_diff_density_rms    0.087 
